# Supplementary material for: Multiomics Assessment of the Gut Microbiome in Rare Hyperoxaluric Conditions
Source: PubMed Central journal article supplement — Kidney Int Rep. 2024 Mar 11;9(6):1836–48. doi: 10.1016/j.ekir.2024.03.004 (PMC11184406; doi:10.1016/j.ekir.2024.03.004), 2024-03-11
Supplement: mmc1.pdf [file mmc1.pdf]

Supplementary Figure 1: Study enrolment by clinical group.

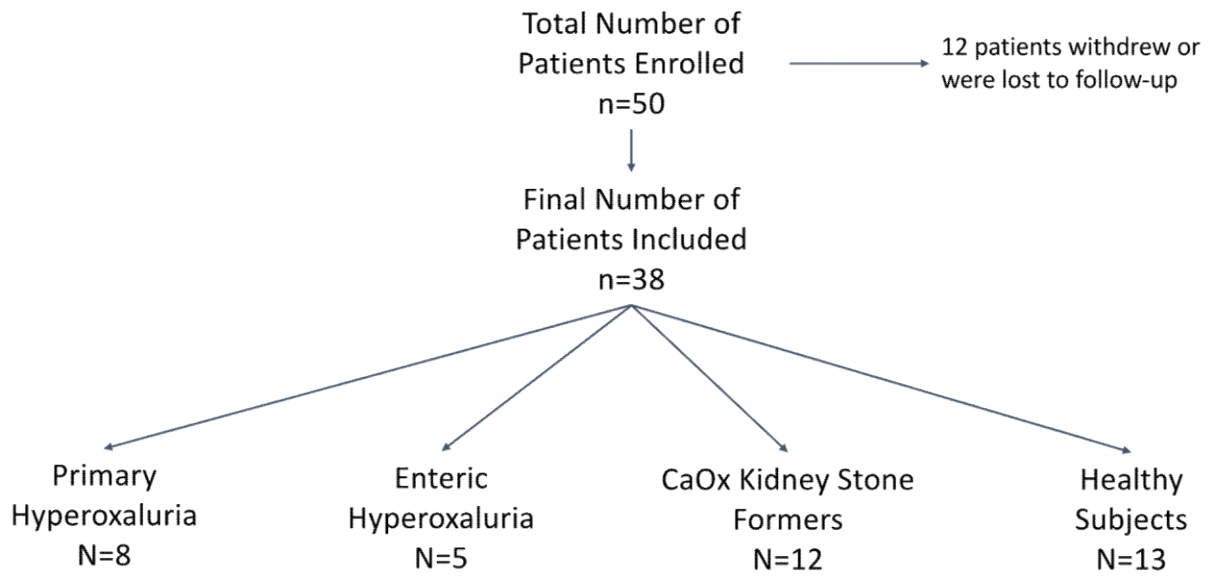

Supplementary Figure 2: Correlation between dietary component and fecal oxalate

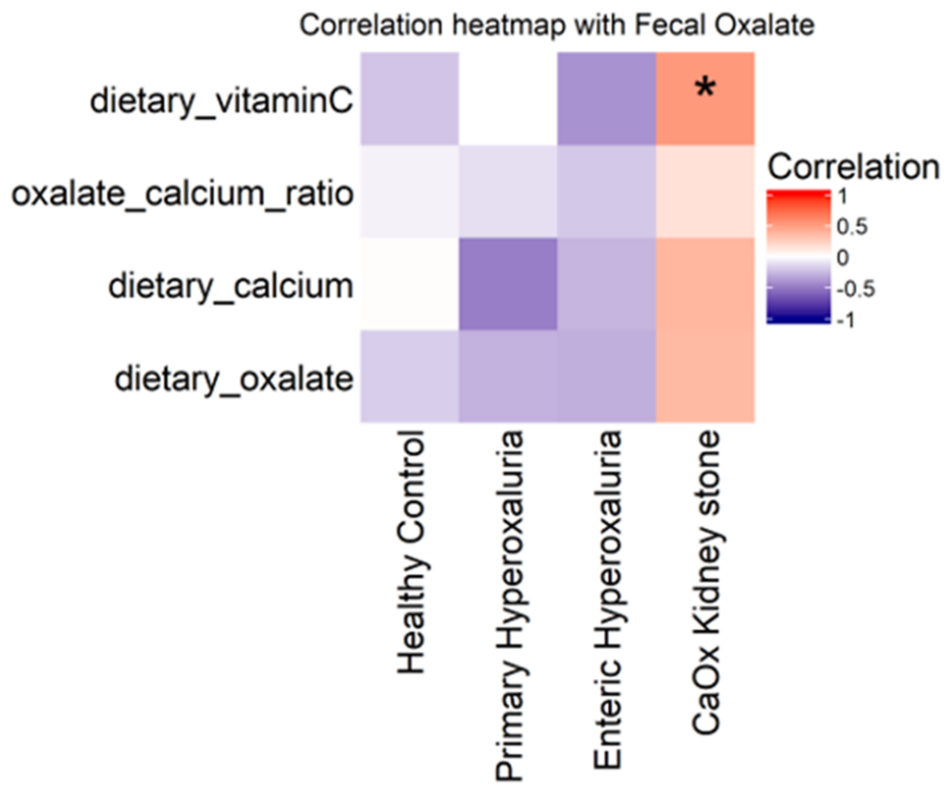

This correlation vary between different subgroups. The Pearson correlation coefficient is used. \* pvalue < 0.1

Supplementary Figure 3: Population Level Contribution of the OXC ODE

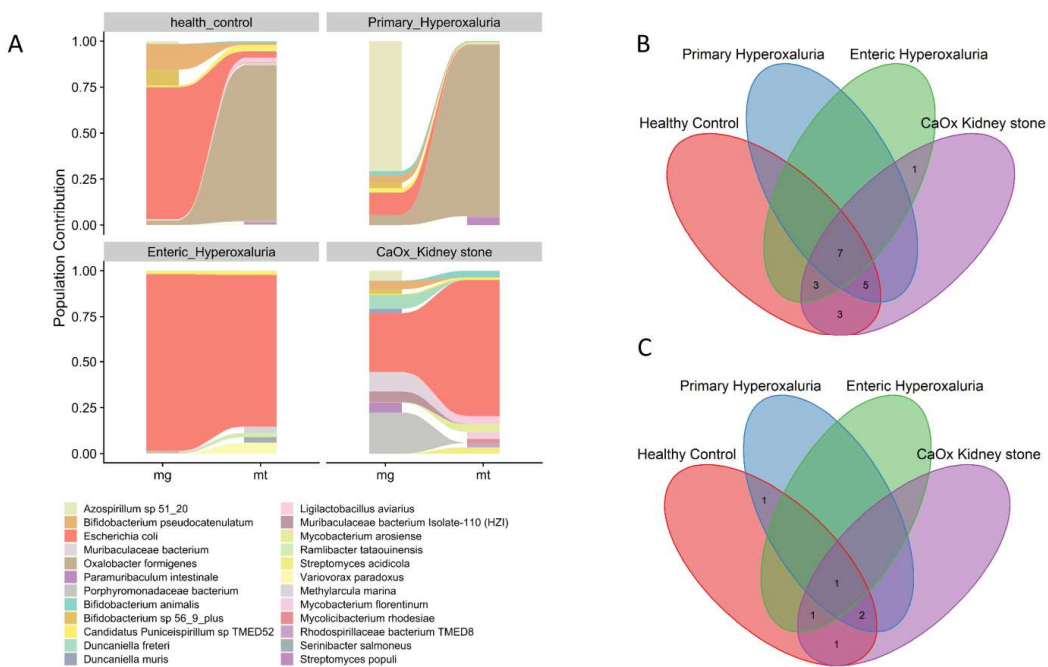

**Panel A:** Population Level Contribution based on OXC metagenomic (MTG) and metatranscriptomic (MTT) level of activity

**Panel B:** Gamma diversity of the oxalobiome based on MG\_OXC

**Panel C:** Gamma diversity of the oxalobiome based on MT\_OXC

## Supplementary Figure 4: Oxalate-Degrading Bacterial Network based on OXC Levels

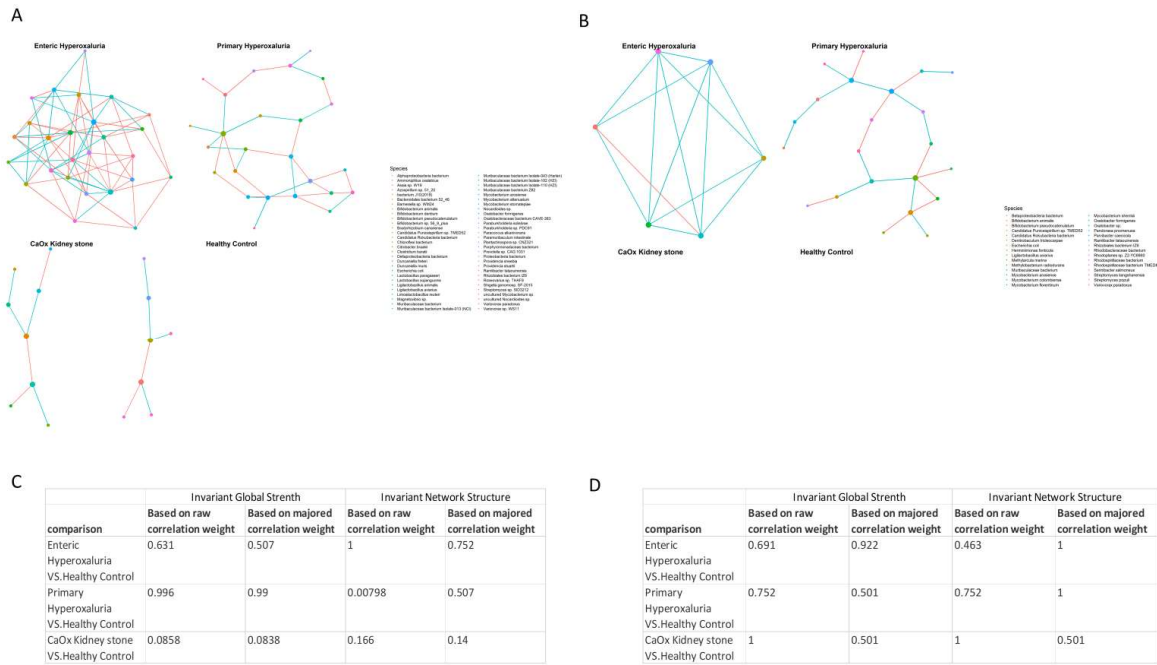

Panel A: Oxalate-degrading bacterial interaction network based on the MTG abundance of OXC

Panel B: Oxalate-degrading bacterial interaction network based on the MTT abundance of OXC

Panel C: Network comparison in the MTG based OXC networks

Panel D: Network comparison in the MTT based OXC networks

A correlation cut-off of 0.2 is used for graphical representation. Red edge is a

negative correlation and a blue edge is a positive correlation. Network comparisons are summarized

in a table of p-values, using two metrics with two types of comparison, one involving the raw

correlation value and the other a majored value.

## Supplementary Tables

|                     |   |                                                              |
|---------------------|---|--------------------------------------------------------------|
| Supplementary Table | 1 | 24h Urinalysis                                               |
| Supplementary Table | 2 | Group comparisons of clinical outcomes: PH vs HC             |
| Supplementary Table | 3 | Group comparisons of clinical outcomes: EH vs HC             |
| Supplementary Table | 4 | Group comparisons of clinical outcomes: CKS vs HC            |
| Supplementary Table | 5 | q-value across 6 pairwise comparisons based on BH correction |
| Supplementary Table | 6 | Gamma diversity - Venn Diagram Taxa                          |

Supplementary Tables 7 to 10 : node betweenness and degree for every species involved in the network

|                     |    |            |
|---------------------|----|------------|
| Supplementary Table | 7  | MTG_FRC_EH |
| Supplementary Table | 8  | MTG_FRC_PH |
| Supplementary Table | 9  | MTT_FRC_EH |
| Supplementary Table | 10 | MTT_FRC_PH |

### Abbreviations

|     |                                     |
|-----|-------------------------------------|
| MTG | Metagenomics Dataset                |
| MTT | Metatranscriptomics Dataset         |
| OXC | Oxalyl-CoA decarboxylase            |
| FRC | Formyl-CoA: oxalate CoA transferase |
| PH  | Primary Hyperoxaluria               |
| EH  | Enteric Hyperoxaluria               |
| CKS | CaOx Kidney stone Formers           |
| HC  | Healthy controls                    |

Supplementary Table 1

| <b>Condition</b>                     | <b>EH</b> | <b>CKS</b> | <b>PH</b> | <b>ANOVA p-value</b> |
|--------------------------------------|-----------|------------|-----------|----------------------|
| 24 hr urine volume (L/24 hr)         | 1.64      | 2.53       | 4.48      | 0.01                 |
| 24 hr calcium results (mg/24 hr)     | 111       | 185.67     | 135.99    | 0.27                 |
| 24 hr citrate results (mg/24 hr)     | 526.98    | 493        | 399.29    | 0.73                 |
| 24 hr potassium results (mmol/24 hr) | 53.6      | 51.1       | 82        | 0.15                 |
| 24 hr sodium results (mmol/24 hr)    | 168.8     | 147.11     | 184.57    | 0.61                 |
| pH level                             | 5.92      | 6.22       | 6.3       | 0.43                 |
| CaOx SS                              | 2.38      | 3.65       | 3         | 0.56                 |

Supplementary Table 2

**Group comparisons of clinical outcomes: Primary Hyperoxaluria vs Healthy Control**

|                                      | <b>HC<br/>(N=13)</b>  | <b>PH<br/>(N=8)</b>   | <b>P-value</b> |
|--------------------------------------|-----------------------|-----------------------|----------------|
| <b>Age</b>                           |                       |                       |                |
| Mean (SD)                            | 39.1 (11.8)           | 33.0 (13.6)           | 0.316          |
| Median [Min, Max]                    | 34.0 [24.0, 58.0]     | 29.0 [21.0, 63.0]     |                |
| <b>Sex</b>                           |                       |                       |                |
| Female / Male                        | 7 (53.8%) / 6 (46.2%) | 6 (75.0%) / 2 (25.0%) | 0.4            |
| <b>Ethnicity</b>                     |                       |                       |                |
| Hispanic or Latino                   | 2 (15.4%)             | 0 (0%)                | 0.505          |
| not Hispanic or Latino               | 11 (84.6%)            | 8 (100%)              |                |
| <b>Race</b>                          |                       |                       |                |
| White                                | 11 (84.6%)            | 6 (75.0%)             | 0.713          |
| More than one / unknown / unreported | 2 (15.4%)             | 1 (12.5%)             |                |
| American Indian                      | 0 (0%)                | 1 (12.5%)             |                |
| <b>Height</b>                        |                       |                       |                |
| Mean (SD)                            | 166 (10.5)            | 170 (4.60)            | 0.325          |
| Median [Min, Max]                    | 168 [151, 186]        | 169 [166, 176]        |                |
| Missing                              | 1 (7.7%)              | 2 (25.0%)             |                |
| <b>Weight</b>                        |                       |                       |                |
| Mean (SD)                            | 70.4 (13.7)           | 72.3 (8.40)           | 0.71           |
| Median [Min, Max]                    | 73.7 [46.0, 94.3]     | 71.6 [61.2, 84.8]     |                |
| Missing                              | 1 (7.7%)              | 2 (25.0%)             |                |
| <b>BMI</b>                           |                       |                       |                |
| Mean (SD)                            | 25.2 (3.43)           | 24.9 (1.76)           | 0.809          |
| Median [Min, Max]                    | 25.4 [19.9, 31.5]     | 25.0 [22.2, 27.6]     |                |
| Missing                              | 1 (7.7%)              | 2 (25.0%)             |                |
| <b>dietary_calcium</b>               |                       |                       |                |
| Mean (SD)                            | 1160 (629)            | 1320 (464)            | 0.535          |
| Median [Min, Max]                    | 1010 [541, 2520]      | 1290 [666, 1970]      |                |
| Missing                              | 1 (7.7%)              | 1 (12.5%)             |                |
| <b>dietary_oxalate</b>               |                       |                       |                |
| Mean (SD)                            | 236 (316)             | 333 (323)             | 0.537          |
| Median [Min, Max]                    | 134 [103, 1230]       | 159 [110, 967]        |                |
| Missing                              | 1 (7.7%)              | 1 (12.5%)             |                |
| <b>oxalate_calcium_ratio</b>         |                       |                       |                |
| Mean (SD)                            | 0.228 (0.233)         | 0.250 (0.196)         | 0.828          |
| Median [Min, Max]                    | 0.132 [0.0721, 0.853] | 0.118 [0.0805, 0.579] |                |
| Missing                              | 1 (7.7%)              | 1 (12.5%)             |                |
| <b>dietary_vitaminC</b>              |                       |                       |                |
| Mean (SD)                            | 80.4 (37.6)           | 152 (61.5)            | 0.0225         |
| Median [Min, Max]                    | 71.5 [41.1, 173]      | 155 [39.5, 233]       |                |
| Missing                              | 1 (7.7%)              | 1 (12.5%)             |                |
| <b>fecal_Oxalate</b>                 |                       |                       |                |
| Mean (SD)                            | 0.240 (0.0944)        | 0.998 (0.140)         | <0.001         |
| Median [Min, Max]                    | 0.261 [0.106, 0.421]  | 1.01 [0.785, 1.18]    |                |
| <b>oxalate_urine</b>                 |                       |                       |                |
| Mean (SD)                            | 31.9 (7.73)           | 99.9 (57.0)           | 0.0118         |
| Median [Min, Max]                    | 34.4 [12.2, 39.7]     | 80.8 [64.0, 235]      |                |

Supplementary Table 3

**Group comparisons of clinical outcomes: Enteric Hyperoxaluria vs Healthy Control**

|                                      | <b>EH<br/>(N=5)</b>   | <b>HC<br/>(N=13)</b>  | <b>P-value</b> |
|--------------------------------------|-----------------------|-----------------------|----------------|
| <b>Age</b>                           |                       |                       |                |
| Mean (SD)                            | 55.6 (14.5)           | 39.1 (11.8)           | 0.0623         |
| Median [Min, Max]                    | 53.0 [39.0, 72.0]     | 34.0 [24.0, 58.0]     |                |
| <b>Sex</b>                           |                       |                       |                |
| Female / Male                        | 4 (80.0%) / 1 (20.0%) | 7 (53.8%) / 6 (46.2%) | 0.596          |
| <b>Ethnicity</b>                     |                       |                       |                |
| not Hispanic or Latino               | 5 (100%)              | 11 (84.6%)            | 1              |
| Hispanic or Latino                   | 0 (0%)                | 2 (15.4%)             |                |
| <b>Race</b>                          |                       |                       |                |
| White                                | 5 (100%)              | 11 (84.6%)            | 1              |
| More than one / unknown / unreported | 0 (0%)                | 2 (15.4%)             |                |
| <b>Height</b>                        |                       |                       |                |
| Mean (SD)                            | 167 (7.82)            | 166 (10.5)            | 0.993          |
| Median [Min, Max]                    | 163 [160, 177]        | 168 [151, 186]        |                |
| Missing                              | 0 (0%)                | 1 (7.7%)              |                |
| <b>Weight</b>                        |                       |                       |                |
| Mean (SD)                            | 99.4 (19.6)           | 70.4 (13.7)           | 0.0252         |
| Median [Min, Max]                    | 104 [67.7, 121]       | 73.7 [46.0, 94.3]     |                |
| Missing                              | 0 (0%)                | 1 (7.7%)              |                |
| <b>BMI</b>                           |                       |                       |                |
| Mean (SD)                            | 35.7 (5.88)           | 25.2 (3.43)           | 0.0127         |
| Median [Min, Max]                    | 38.0 [25.6, 40.4]     | 25.4 [19.9, 31.5]     |                |
| Missing                              | 0 (0%)                | 1 (7.7%)              |                |
| <b>dietary_calcium</b>               |                       |                       |                |
| Mean (SD)                            | 1250 (426)            | 1160 (629)            | 0.757          |
| Median [Min, Max]                    | 1150 [851, 1850]      | 1010 [541, 2520]      |                |
| Missing                              | 1 (20.0%)             | 1 (7.7%)              |                |
| <b>dietary_oxalate</b>               |                       |                       |                |
| Mean (SD)                            | 331 (275)             | 236 (316)             | 0.587          |
| Median [Min, Max]                    | 222 [143, 736]        | 134 [103, 1230]       |                |
| Missing                              | 1 (20.0%)             | 1 (7.7%)              |                |
| <b>oxalate_calcium_ratio</b>         |                       |                       |                |
| Mean (SD)                            | 0.275 (0.232)         | 0.228 (0.233)         | 0.736          |
| Median [Min, Max]                    | 0.176 [0.130, 0.620]  | 0.132 [0.0721, 0.853] |                |
| Missing                              | 1 (20.0%)             | 1 (7.7%)              |                |
| <b>dietary_vitaminC</b>              |                       |                       |                |
| Mean (SD)                            | 133 (152)             | 80.4 (37.6)           | 0.544          |
| Median [Min, Max]                    | 68.8 [33.5, 359]      | 71.5 [41.1, 173]      |                |
| Missing                              | 1 (20.0%)             | 1 (7.7%)              |                |
| <b>fecal_Oxalate</b>                 |                       |                       |                |
| Mean (SD)                            | 0.932 (0.117)         | 0.240 (0.0944)        | <0.001         |
| Median [Min, Max]                    | 0.914 [0.813, 1.12]   | 0.261 [0.106, 0.421]  |                |
| <b>oxalate_urine</b>                 |                       |                       |                |
| Mean (SD)                            | 62.5 (12.7)           | 31.9 (7.73)           | 0.00357        |
| Median [Min, Max]                    | 59.0 [47.5, 79.2]     | 34.4 [12.2, 39.7]     |                |



Supplementary Table 4

**Group comparisons of clinical outcomes: CaOx Kidney stone vs Healthy Control**

|                                      | <b>CKS<br/>(N=12)</b> | <b>HC<br/>(N=13)</b>  | <b>P-value</b> |
|--------------------------------------|-----------------------|-----------------------|----------------|
| <b>Age</b>                           |                       |                       |                |
| Mean (SD)                            | 47.5 (13.8)           | 39.1 (11.8)           | 0.117          |
| Median [Min, Max]                    | 51.0 [25.0, 67.0]     | 34.0 [24.0, 58.0]     |                |
| <b>Sex</b>                           |                       |                       |                |
| Male                                 |                       |                       |                |
| <b>Ethnicity</b>                     |                       |                       |                |
| Hispanic or Latino                   | 1 (8.3%)              | 2 (15.4%)             | 1              |
| not Hispanic or Latino               | 11 (91.7%)            | 11 (84.6%)            |                |
| <b>Race</b>                          |                       |                       |                |
| More than one / unknown / unreported | 2 (16.7%)             | 2 (15.4%)             | 1              |
| White                                | 10 (83.3%)            | 11 (84.6%)            |                |
| <b>Height</b>                        |                       |                       |                |
| Mean (SD)                            | 174 (8.62)            | 166 (10.5)            | 0.0625         |
| Median [Min, Max]                    | 175 [162, 186]        | 168 [151, 186]        |                |
| Missing                              | 0 (0%)                | 1 (7.7%)              |                |
| <b>Weight</b>                        |                       |                       |                |
| Mean (SD)                            | 83.5 (21.2)           | 70.4 (13.7)           | 0.0875         |
| Median [Min, Max]                    | 78.0 [52.2, 120]      | 73.7 [46.0, 94.3]     |                |
| Missing                              | 0 (0%)                | 1 (7.7%)              |                |
| <b>BMI</b>                           |                       |                       |                |
| Mean (SD)                            | 27.2 (5.43)           | 25.2 (3.43)           | 0.294          |
| Median [Min, Max]                    | 25.9 [19.4, 39.6]     | 25.4 [19.9, 31.5]     |                |
| Missing                              | 0 (0%)                | 1 (7.7%)              |                |
| <b>dietary_calcium</b>               |                       |                       |                |
| Mean (SD)                            | 1300 (742)            | 1160 (629)            | 0.626          |
| Median [Min, Max]                    | 1190 [494, 3020]      | 1010 [541, 2520]      |                |
| Missing                              | 0 (0%)                | 1 (7.7%)              |                |
| <b>dietary_oxalate</b>               |                       |                       |                |
| Mean (SD)                            | 212 (167)             | 236 (316)             | 0.821          |
| Median [Min, Max]                    | 190 [49.7, 619]       | 134 [103, 1230]       |                |
| Missing                              | 0 (0%)                | 1 (7.7%)              |                |
| <b>oxalate_calcium_ratio</b>         |                       |                       |                |
| Mean (SD)                            | 0.184 (0.144)         | 0.228 (0.233)         | 0.59           |
| Median [Min, Max]                    | 0.141 [0.0532, 0.553] | 0.132 [0.0721, 0.853] |                |
| Missing                              | 0 (0%)                | 1 (7.7%)              |                |
| <b>dietary_vitaminC</b>              |                       |                       |                |
| Mean (SD)                            | 156 (129)             | 80.4 (37.6)           | 0.0729         |
| Median [Min, Max]                    | 129 [14.0, 371]       | 71.5 [41.1, 173]      |                |
| Missing                              | 0 (0%)                | 1 (7.7%)              |                |
| <b>fecal_Oxalate</b>                 |                       |                       |                |
| Mean (SD)                            | 0.742 (0.192)         | 0.240 (0.0944)        | <0.001         |
| Median [Min, Max]                    | 0.687 [0.434, 1.12]   | 0.261 [0.106, 0.421]  |                |
| <b>oxalate_urine</b>                 |                       |                       |                |
| Mean (SD)                            | 33.8 (12.2)           | 31.9 (7.73)           | 0.655          |
| Median [Min, Max]                    | 34.8 [12.3, 52.0]     | 34.4 [12.2, 39.7]     |                |

Supplementary Table 5

q-value across 6 pairwise comparisons based on BH correction

|                  |                           | EH vs. PH | EH vs. CKS | EH vs. HC | PH vs. CKS | PH vs. HC | CKS vs. HC |
|------------------|---------------------------|-----------|------------|-----------|------------|-----------|------------|
|                  | Age                       | 0.105     | 0.322      | 0.125     | 0.105      | 0.322     | 0.176      |
|                  | Sex                       | 1         | 0.509      | 0.715     | 0.509      | 0.642     | 0.642      |
|                  | Ethnicity                 | 1         | 1          | 1         | 1          | 1         | 1          |
|                  | Race                      | 1         | 1          | 1         | 1          | 1         | 1          |
| Body Measures    | Height (cm)               | 0.48      | 0.329      | 0.993     | 0.414      | 0.48      | 0.329      |
|                  | Weight (kg)               | 0.1       | 0.211      | 0.1       | 0.198      | 0.71      | 0.175      |
|                  | BMI                       | 0.038     | 0.055      | 0.038     | 0.303      | 0.809     | 0.353      |
| Nutritional Data | Dietary Calcium (mg)      | 0.939     | 0.939      | 0.939     | 0.939      | 0.939     | 0.939      |
|                  | Dietary Oxalate (mg)      | 0.991     | 0.881      | 0.881     | 0.881      | 0.881     | 0.985      |
|                  | Ox/Ca Ratio               | 0.859     | 0.859      | 0.859     | 0.859      | 0.859     | 0.859      |
|                  | Dietary Vitamin C         | 0.919     | 0.919      | 0.919     | 0.919      | 0.135     | 0.219      |
| Outcomes         | Fecal Oxalate (uM/mg)     | 0.383     | 0.034      | 3.82E-05  | 0.004      | 2.02E-07  | 1.40E-06   |
|                  | Urinary Oxalate (mg/24hr) | 0.134     | 0.011      | 0.011     | 0.02       | 0.02      | 0.655      |

Supplementary Table 6

## Gamma diversity - Venn Diagram Taxa

|                  | FRC                                                                                                                                                                                                                                            | MTG                                                                                    | OXC                                                                                                                               | FRC                        | MTT | OXC |
|------------------|------------------------------------------------------------------------------------------------------------------------------------------------------------------------------------------------------------------------------------------------|----------------------------------------------------------------------------------------|-----------------------------------------------------------------------------------------------------------------------------------|----------------------------|-----|-----|
| <b>EH:PH</b>     | Betaproteobacteria<br>bacterium<br>RIFCSPLOWO2_12_FULL<br>_68_20                                                                                                                                                                               | NA                                                                                     | NA                                                                                                                                | NA                         | NA  | NA  |
| <b>EH:CKS</b>    | NA                                                                                                                                                                                                                                             | Paramuribaculum<br>intestinale                                                         | NA                                                                                                                                | NA                         | NA  | NA  |
| <b>EH:HC</b>     | NA                                                                                                                                                                                                                                             | NA                                                                                     | NA                                                                                                                                | NA                         | NA  | NA  |
| <b>PH:CKS</b>    | NA                                                                                                                                                                                                                                             | NA                                                                                     | NA                                                                                                                                | NA                         | NA  | NA  |
| <b>PH:HC</b>     | Filomicrobium sp.                                                                                                                                                                                                                              | NA                                                                                     | Betaproteobacteria<br>bacterium<br>RIFCSPLOWO2_02_FULL<br>_62_17; Muribaculaceae<br>bacterium;<br>Muribaculaceae<br>bacterium Z82 | Oxalobacter formigenes     |     |     |
| <b>CKS:HC</b>    | Adlercreutzia<br>mucosicola; Azospirillum<br>brasilense;<br>Bifidobacterium<br>magnum;<br>Ligilactobacillus aviarius;<br>Muribaculaceae<br>bacterium Isolate-002<br>(NCI); Paraburkholderia<br>megapolitana;<br>Streptomyces<br>violaceusniger | Ligilactobacillus aviarius;<br>Mycobacterium<br>arosiense; Streptomyces<br>sp. SID3212 | NA                                                                                                                                | Ligilactobacillus aviarius |     |     |
| <b>EH:PH:CKS</b> | Pseudonocardia<br>kunmingensis                                                                                                                                                                                                                 | NA                                                                                     | Ammoniphilus oxalaticus                                                                                                           | NA                         |     |     |
| <b>EH:PH:HC</b>  | Acidobacteria<br>bacterium; Starkeya<br>novella; Sulfobacillus<br>acidophilus                                                                                                                                                                  | NA                                                                                     | NA                                                                                                                                | NA                         | NA  | NA  |

|                           | FRC                      | MTG                       | OXC | FRC                     | MTT              | OXC |
|---------------------------|--------------------------|---------------------------|-----|-------------------------|------------------|-----|
| <b>EH:CKS:HC</b>          | Actinophytocola sp.;     |                           |     |                         |                  |     |
|                           | Bacteroides sp. CAG:927; |                           |     |                         |                  |     |
|                           | mine drainage            |                           |     |                         |                  |     |
|                           | metagenome;              |                           |     |                         |                  |     |
|                           | Paramuribaculum          |                           |     |                         |                  |     |
|                           | intestinale;             |                           |     |                         |                  |     |
|                           | Porphyromonadaceae       | Muribaculaceae            |     |                         |                  |     |
|                           | bacterium;               | bacterium;                |     |                         |                  |     |
|                           | Pseudonocardiaceae       | Porphyromonadaceae        |     |                         |                  |     |
|                           | bacterium;               | bacterium; Prevotella sp. |     |                         |                  |     |
| Streptomyces sp. AZ1-7    | CAG:1031                 |                           | NA  |                         | Escherichia coli |     |
|                           |                          |                           |     | Azospirillum sp. 51_20; |                  |     |
|                           |                          |                           |     | Betaproteobacteria      |                  |     |
|                           |                          |                           |     | bacterium;              |                  |     |
|                           |                          |                           |     | Betaproteobacteria      |                  |     |
|                           |                          |                           |     | bacterium UKL13-2;      |                  |     |
|                           |                          |                           |     | Bifidobacterium         |                  |     |
|                           |                          |                           |     | pseudocatenulatum;      |                  |     |
|                           |                          |                           |     | Candidatus              |                  |     |
| Bifidobacterium           | Ammoniphilus             |                           |     | Entotheonella factor;   |                  |     |
| pseudocatenulatum;        | oxalaticus; Azospirillum |                           |     | Ephemera danica;        |                  |     |
| Bifidobacterium sp.       | sp. 51_20;               |                           |     | Oxalobacter formigenes; |                  |     |
| 56_9_plus; Kribbella      | Bifidobacterium          |                           |     | Porphyromonadaceae      |                  |     |
| flavida; Lentzea deserti; | pseudocatenulatum;       |                           |     | bacterium; Providencia  | Bifidobacterium  |     |
| Muribaculaceae            | Bifidobacterium sp.      |                           |     | rettgeri;               | animalis;        |     |
| bacterium; Providencia    | 56_9_plus;               |                           |     | Rhodospirillaceae       | Mycobacterium    |     |
| stuartii; Streptomyces    | Deltaproteobacteria      |                           |     | bacterium               | arosiense        |     |
| luteus                    | bacterium                |                           |     |                         |                  |     |
| <b>PH:CKS:HC</b>          |                          |                           |     |                         |                  |     |

Supplementary Table 7

**MG\_FRC\_EH**

| <b>Species</b>                                         | <b>Node Betweenness</b> | <b>Node Degree</b> |
|--------------------------------------------------------|-------------------------|--------------------|
| Ligilactobacillus animalis                             | 50.385                  | 22                 |
| Pseudonocardiaceae bacterium                           | 49.231                  | 21                 |
| Caballeronia grimmiae                                  | 48.676                  | 24                 |
| Actinophytocola sp.                                    | 47.121                  | 24                 |
| Streptomyces scopuliridis                              | 42.035                  | 20                 |
| Halopolyspora algeriensis                              | 40.626                  | 20                 |
| Limosilactobacillus mucosae                            | 38.008                  | 18                 |
| Paraburkholderia caballeronis                          | 36.043                  | 19                 |
| Nonomuraea polychroma                                  | 33.761                  | 19                 |
| Alphaproteobacteria bacterium                          | 33.148                  | 17                 |
| Streptomyces sp. AZ1-7                                 | 32.721                  | 20                 |
| bacterium D16-34                                       | 32.709                  | 18                 |
| Nocardiopsis sinuspersici                              | 30.919                  | 17                 |
| Bifidobacterium dentium                                | 29.941                  | 18                 |
| Kibdelosporangium sp. MJ126-NF4                        | 29.814                  | 19                 |
| Afipia sp. 64-13                                       | 27.244                  | 15                 |
| Starkeya novella                                       | 26.994                  | 17                 |
| Oxalobacter formigenes                                 | 26.287                  | 18                 |
| Bacteroides sp. CAG:927                                | 26.208                  | 14                 |
| Porphyromonadaceae bacterium                           | 24.911                  | 15                 |
| Pigmentiphaga sp. NML080357                            | 24.376                  | 15                 |
| Burkholderiales bacterium                              | 24.334                  | 15                 |
| Amycolatopsis suaedae                                  | 24.239                  | 16                 |
| Paraburkholderia sp. SOS3                              | 23.754                  | 16                 |
| Mycobacterium sp. SWH-M5                               | 23.631                  | 16                 |
| Sulfobacillus acidophilus                              | 23.171                  | 17                 |
| Barnesiella sp. WM24                                   | 22.059                  | 15                 |
| Enterobacter cancerogenus                              | 21.841                  | 14                 |
| Thermostaphylospora chromogena                         | 21.289                  | 15                 |
| Cupriavidus basilensis                                 | 20.904                  | 16                 |
| Pandoraea thiooxydans                                  | 20.783                  | 15                 |
| Betaproteobacteria bacterium RIFCSPLOWO2_12_FULL_68_20 | 20.702                  | 14                 |
| Roseovarius sp. A-2                                    | 20.072                  | 13                 |
| mine drainage metagenome                               | 19.904                  | 13                 |
| Nonomuraea terrae                                      | 19.746                  | 16                 |
| Muribaculaceae bacterium Isolate-036 (Harlan)          | 19.084                  | 13                 |
| Cupriavidus sp. OV038                                  | 18.958                  | 14                 |
| Inquilinus limosus                                     | 18.860                  | 14                 |
| Candidatus Entotheonella factor                        | 18.178                  | 15                 |
| Cupriavidus gilardii                                   | 17.443                  | 12                 |
| Azospirillum sp. 51_20                                 | 17.141                  | 14                 |
| Mycolicibacterium sp. P9-64                            | 16.186                  | 13                 |
| Providencia rettgeri                                   | 15.802                  | 13                 |
| Mycobacterium sherrisii                                | 15.518                  | 14                 |
| bacterium MnTg02                                       | 15.263                  | 13                 |
| Mycobacterium sp. BK086                                | 14.775                  | 12                 |
| Streptomyces sp. 8K308                                 | 14.161                  | 12                 |
| Bradyrhizobium huanghuaihaiense                        | 13.781                  | 13                 |
| Acidobacteria bacterium                                | 13.746                  | 12                 |

|                                                   |        |    |
|---------------------------------------------------|--------|----|
| Pseudonocardia kunmingensis                       | 13.552 | 12 |
| Escherichia coli                                  | 12.741 | 14 |
| Candidatus Muproteobacteria bacterium RBG_16_60_9 | 12.571 | 9  |
| Deltaproteobacteria bacterium                     | 12.529 | 11 |
| Streptomyces glauciniger                          | 12.506 | 12 |
| Gammaproteobacteria bacterium                     | 11.279 | 11 |
| Bifidobacterium pseudolongum                      | 11.185 | 12 |
| Bifidobacterium sp.                               | 10.795 | 12 |
| Paramuribaculum intestinale                       | 9.135  | 8  |
| alpha proteobacterium BAL199                      | 9.061  | 11 |
| Streptomyces populi                               | 7.013  | 12 |
| Betaproteobacteria bacterium                      | 6.148  | 9  |

Supplementary Table 8

**MG\_FRC\_PH**

| <b>Species</b>                                         | <b>Node Betweenness</b> | <b>Node Degree</b> |
|--------------------------------------------------------|-------------------------|--------------------|
| Cupriavidus basilensis                                 | 214.571                 | 14                 |
| Lentzea guizhouensis                                   | 155.302                 | 12                 |
| Labrys okinawensis                                     | 153.866                 | 11                 |
| Pandoraea thiooxydans                                  | 135.922                 | 11                 |
| Bifidobacterium sp. 56_9_plus                          | 135.181                 | 10                 |
| Pseudonocardia kunmingensis                            | 112.028                 | 10                 |
| Streptomyces glauciniger                               | 110.537                 | 10                 |
| Cupriavidus sp. OV038                                  | 105.632                 | 9                  |
| Acrocarpospora macrocephala                            | 99.763                  | 8                  |
| Caballeronia glebae                                    | 99.292                  | 7                  |
| Azorhizobium caulinodans                               | 97.551                  | 9                  |
| Nonomuraea terrae                                      | 79.294                  | 7                  |
| Streptomyces luteus                                    | 77.998                  | 7                  |
| Alphaproteobacteria bacterium                          | 75.355                  | 8                  |
| Sulfobacillus acidophilus                              | 75.211                  | 5                  |
| Chloroflexi bacterium                                  | 71.307                  | 9                  |
| Muribaculaceae bacterium Isolate-036 (Harlan)          | 69.820                  | 8                  |
| Bifidobacterium sp.                                    | 67.908                  | 7                  |
| Muribaculaceae bacterium Z82                           | 63.266                  | 7                  |
| Alphaproteobacteria bacterium MarineAlpha3_Bin4        | 59.248                  | 8                  |
| Betaproteobacteria bacterium RIFCSPLOWO2_12_FULL_68_20 | 58.176                  | 6                  |
| Deltaproteobacteria bacterium                          | 56.305                  | 6                  |
| Nocardiopsaceae bacterium YIM 96095                    | 53.187                  | 8                  |
| Bifidobacterium pseudocatenulatum                      | 52.204                  | 7                  |
| Caballeronia grimmiae                                  | 51.893                  | 7                  |
| Cupriavidus gilardii                                   | 49.216                  | 7                  |
| Streptomonospora sp. M2                                | 48.445                  | 6                  |
| Ammoniphilus oxalaticus                                | 44.581                  | 6                  |
| Providencia huaxiensis                                 | 44.453                  | 6                  |
| Kribbella flavida                                      | 43.554                  | 7                  |
| Rhodospirillales bacterium                             | 41.072                  | 5                  |
| Pseudaestuariaiivita atlantica                         | 38.776                  | 7                  |
| Gammaproteobacteria bacterium                          | 38.329                  | 6                  |
| Lentzea deserti                                        | 36.672                  | 4                  |
| Nocardiopsis sinuspersici                              | 35.086                  | 6                  |
| Nonomuraea sp. C10                                     | 34.982                  | 6                  |
| Limosilactobacillus reuteri                            | 28.408                  | 6                  |
| Limosilactobacillus equigenerosi                       | 27.792                  | 6                  |
| Magnetovibrio sp.                                      | 27.715                  | 6                  |
| Providencia stuartii                                   | 26.022                  | 5                  |
| Bifidobacterium pseudolongum                           | 25.567                  | 5                  |
| Bifidobacterium animalis                               | 24.921                  | 5                  |
| Oxalobacter formigenes                                 | 22.883                  | 4                  |
| Methylobacterium sp. B4                                | 21.419                  | 6                  |
| Pigmentiphaga sp. NML080357                            | 19.664                  | 6                  |
| Bifidobacterium cuniculi                               | 19.242                  | 5                  |
| Xanthobacter tagetidis                                 | 19.067                  | 5                  |
| bacterium D16-34                                       | 14.114                  | 3                  |
| Usitatibacter palustris                                | 13.838                  | 4                  |

|                                        |        |   |
|----------------------------------------|--------|---|
| Escherichia coli                       | 13.361 | 4 |
| Bradyrhizobium huanghuaihaiense        | 11.304 | 3 |
| Actinoplanes sp. ATCC 53533            | 10.971 | 3 |
| Filomicrobium sp.                      | 7.575  | 3 |
| Mycobacterium sherrisii                | 7.416  | 3 |
| Azospirillum sp. 51_20                 | 6.331  | 3 |
| Acidobacteria bacterium                | 5.665  | 3 |
| Candidatus Paraburkholderia sp. 4M-K11 | 5.541  | 3 |
| Betaproteobacteria bacterium           | 5.450  | 3 |
| Mycobacterium sp. SWH-M5               | 4.335  | 3 |
| Mangrovibacter sp. MFB070              | 2.729  | 2 |
| Amycolatopsis suaedae                  | 1.912  | 2 |
| Gemmatimonadetes bacterium             | 1.350  | 2 |
| Muribaculaceae bacterium               | 0.425  | 2 |
| Caballeronia calidae                   | 0.000  | 1 |
| Starkeya novella                       | 0.000  | 1 |



Supplementary Table 9

**MT\_FRC\_EH**

| <b>Species</b>                 | <b>Node Betweenness</b> | <b>Node Degree</b> |
|--------------------------------|-------------------------|--------------------|
| Collimonas fungivorans         | 0.533                   | 7                  |
| Escherichia coli               | 0.367                   | 6                  |
| Ammoniphilus oxalaticus        | 0.367                   | 6                  |
| Hyphomicrobiales bacterium     | 0.200                   | 5                  |
| Streptomyces sp. 8K308         | 0.200                   | 6                  |
| Cupriavidus basilensis         | 0.167                   | 5                  |
| Streptomyces phaeoluteigriseus | 0.167                   | 5                  |

Supplementary Table 10

**MT\_FRC\_PH**

| <b>Species</b>                                         | <b>Node Betweenness</b> | <b>Node Degree</b> |
|--------------------------------------------------------|-------------------------|--------------------|
| Oxalobacter formigenes                                 | 169.705                 | 9                  |
| Adlercreutzia muris                                    | 153.511                 | 6                  |
| Ephemera danica                                        | 145.255                 | 7                  |
| Acidobacteria bacterium RIFCSPLOWO2_02_FULL_67_21      | 144.806                 | 7                  |
| Streptomyces hainanensis                               | 87.375                  | 8                  |
| Rhodospirillales bacterium URHD0017                    | 75.558                  | 5                  |
| Betaproteobacteria bacterium UKL13-2                   | 72.422                  | 4                  |
| Ancylobacter rudongensis                               | 69.657                  | 7                  |
| Mesorhizobium camelthorni                              | 69.464                  | 4                  |
| Betaproteobacteria bacterium RIFCSPLOWO2_12_FULL_64_23 | 63.669                  | 4                  |
| Labrys okinawensis                                     | 62.961                  | 5                  |
| Muribaculaceae bacterium Z82                           | 61.660                  | 4                  |
| Amycolatopsis saalfeldensis                            | 59.712                  | 5                  |
| Betaproteobacteria bacterium RIFCSPLOWO2_02_FULL_63_19 | 58.742                  | 5                  |
| Bifidobacterium pseudocatenulatum                      | 58.338                  | 3                  |
| Muribaculaceae bacterium                               | 57.345                  | 5                  |
| Escherichia coli                                       | 56.652                  | 5                  |
| Streptomyces sp. IB201691-2A2                          | 53.226                  | 6                  |
| Caballeronia hypogeia                                  | 52.694                  | 4                  |
| Betaproteobacteria bacterium RIFCSPLOWO2_02_FULL_62_17 | 52.440                  | 4                  |
| Azospirillum sp. 51_20                                 | 51.172                  | 5                  |
| Methylobacterium sp. AMS5                              | 50.829                  | 5                  |
| Nocardiopsis flavescens                                | 50.279                  | 4                  |
| Bacteroides sp. CAG:927                                | 49.506                  | 4                  |
| Acidobacteria bacterium                                | 40.570                  | 4                  |
| Rhizobiales bacterium 62-47                            | 40.542                  | 4                  |
| Massilia umbonata                                      | 36.627                  | 4                  |
| Providencia rettgeri                                   | 35.322                  | 5                  |
| Betaproteobacteria bacterium                           | 30.763                  | 4                  |
| Rhizobiales bacterium 12-68-15                         | 27.438                  | 3                  |
| Gammaproteobacteria bacterium                          | 25.098                  | 4                  |
| Candidatus Entothionella factor                        | 25.047                  | 3                  |
| Polynucleobacter paneuropaeus                          | 22.010                  | 4                  |
| Betaproteobacteria bacterium RIFCSPLOWO2_12_FULL_65_14 | 21.304                  | 2                  |
| Acidobacteria bacterium RIFCSPLOWO2_12_FULL_67_14b     | 18.960                  | 2                  |
| Cupriavidus nantongensis                               | 18.076                  | 3                  |
| Cupriavidus basilensis                                 | 14.267                  | 3                  |
| Paramuribaculum intestinale                            | 11.388                  | 3                  |
| Ligilactobacillus animalis                             | 9.708                   | 2                  |
| Porphyromonadaceae bacterium                           | 7.337                   | 2                  |
| Paracoccus saliphilus                                  | 7.167                   | 2                  |
| Rhodospirillaceae bacterium                            | 6.429                   | 4                  |
| Rhodospirillales bacterium                             | 6.376                   | 2                  |
| Usitatibacter rugosus                                  | 5.408                   | 2                  |
| Proteobacteria bacterium                               | 4.483                   | 2                  |
| Bifidobacterium criceti                                | 3.700                   | 2                  |
| Bifidobacterium pseudolongum                           | 0.000                   | 2                  |
| Silicimonas algicola                                   | 0.000                   | 1                  |
| Ammoniphilus oxalaticus                                | 0.000                   | 2                  |
